# Supplementary material
Source: publisher site journal article supplement (https://www.dovepress.com/article/435622)
Supplement: Supplementary file 1 [file get_supplementary_file.php]

**Table S1:** Information about patients from whom bacterial samples were obtained.

| **Patient´s No.** | **Patient´s age** | **Patient´s sex** | **Type of wound** | **Place of wound** | **Sample´s origin** | **Sample No.** | **Identified bacteria** |
| --- | --- | --- | --- | --- | --- | --- | --- |
| 8 | 44 | M | perianal fistula | annus | 21.03.2018 | S8B1 | *Escherichia coli* |
| 8 | 44 | M | perianal fistula | annus | 21.03.2018 | S8B2 | *Escherichia coli* |
| 8 | 44 | M | perianal fistula | annus | 21.03.2018 | S8C1 | *Escherichia coli* |
| 8 | 44 | M | perianal fistula | annus | 21.03.2018 | S8C2 | *Escherichia coli* |
| 13 | 84 | M | decubitus sacra | buttock | 03.04.2018 | S13B1 | *Escherichia coli* |
| 37 | 37 | M | gluteal area decubitus | gluteal area | 07.06.2018 | S37B1 | *Escherichia coli* |
| 38 | 82 | M | amputed stump of lower limb | lower limb | 07.06.2018 | S38B1a | *Escherichia coli* |
| 45 | 67 | M | periproctal fistula | annus | 10.07.2018 | S45B1 | *Escherichia coli* |
| 48 | 36 | F | periproctal abcess | wound below thigh communicating with annus | 16.07.2018 | S48C1 | *Escherichia coli* |
| 60 | 36 | F | butocks abscess | buttock | 23.08.2018 | S60C1 | *Escherichia coli* |
| 63 | 52 | M | ulcus cruris | legs | 30.08.2018 | S63C1 | *Escherichia coli* |
| 70 | Not available | M | decubitus of the gluteal region | gluteum | 09.10.2018 | S70C2 | *Escherichia coli* |

| **Isolates** | **Tested β-lactam antiobiotics with use range [μg/ml] for G- bacteria** | | | | | | | | | | |
| --- | --- | --- | --- | --- | --- | --- | --- | --- | --- | --- | --- |
| **Ertapenem** | **Imipenem** | **Meropenem** | **Cefuroxime** | **Ceftazidime** | **Cefotaxime** | **Cefepime** | **Ampicilin** | **Piperacillin** | **Amoxicillin-Clavulanate (f)** | **Piperacillin-Tazobactam** |
| **0.25-1** | **0.25-8** | **0.125-8** | **4-8** | **0.5-8** | **1-4** | **2-8** | **2-8** | **4-16** | **2/2-32/2** | **4/4-16/4** |
| **8B1** | ≤ 0.25 | ≤ 0.25 | ≤ 0.13 | 4 | ≤ 0.5 | ≤ 1 | ≤ 1 | ≤ 2 | ≤ 4 | 4/2 | ≤ 4/4 |
| **8B2** | ≤ 0.25 | 0.5 | ≤ 0.13 | 4 | ≤ 0.5 | ≤ 1 | ≤ 1 | ≤ 2 | ≤ 4 | 4/2 | ≤ 4/4 |
| **8C1** | ≤ 0.25 | ≤ 0.25 | ≤ 0.13 | 4 | ≤ 0.5 | ≤ 1 | ≤ 1 | ≤ 2 | ≤ 4 | 4/2 | ≤ 4/4 |
| **8C2** | ≤ 0.25 | ≤ 0.25 | ≤ 0.13 | 4 | ≤ 0.5 | ≤ 1 | ≤ 1 | > 8 | > 16 | 8/2 | ≤ 4/4 |
| **13B1** | ≤ 0.25 | ≤ 0.25 | ≤ 0.13 | >8 | 2 | > 4 | 8 | > 8 | > 16 | 32/2 | ≤ 4/4 |
| **37B1** | ≤ 0.25 | ≤ 0.25 | ≤ 0.13 | 4 | ≤ 0.5 | ≤ 1 | ≤ 1 | > 8 | > 16 | 8/2 | ≤ 4/4 |
| **38B1 a** | > 1 | ≤ 0.25 | ≤ 0.13 | 4 | ≤ 0.5 | ≤ 1 | ≤ 1 | 4 | ≤ 4 | 8/2 | ≤ 4/4 |
| **45B1** | ≤ 0.25 | ≤ 0.25 | ≤ 0.13 | 4 | ≤ 0.5 | ≤ 1 | ≤ 1 | > 8 | > 16 | 8/2 | ≤ 4/4 |
| **48C1** | ≤ 0.25 | ≤ 0.25 | ≤ 0.13 | 4 | ≤ 0.5 | ≤ 1 | ≤ 1 | <=2 | ≤ 4 | 4/2 | ≤ 4/4 |
| **60C1** | ≤ 0.25 | ≤ 0.25 | ≤ 0.13 | >8 | 2 | > 4 | > 8 | > 8 | > 16 | > 32/2 | > 16/4 |
| **63C1** | ≤ 0.25 | 0.5 | ≤ 0.13 | ≤ 2 | ≤ 0.5 | ≤ 1 | ≤ 1 | > 8 | > 16 | 32/2 | ≤ 4/4 |
| **70C2** | ≤ 0.25 | ≤ 0.25 | ≤ 0.13 | 8 | ≤ 0.5 | ≤ 1 | ≤ 1 | > 8 | > 16 | > 32/2 | ≤ 4/4 |
|  |  |  |  |  |  |  |  |  |  |  |  |
|  |  | S | Susceptible |  | R | Resistant |  | I | Intermediate Resistant |  |  |

**Table S2:** Minimum inhibitory concentrations of commonly used β-lactam antibiotics [μg/ml] on *E. coli* isolates.
